# Supplementary material
Source: publisher figshare collection journal article supplement (https://gsapubs.figshare.com/ndownloader/files/23308976)
Supplement: Supplementary file 1 [file 23308976]

2    **What do earthquakes reveal about ambient shear stresses in the upper crust?**

3                                    **(by Guy Simpson)**

4    The Supplementary material provided here includes the following items:

- 5        • Description of Mechanical model
- 6        • Description of Monte Carlo model
- 7        • Table DR1
- 8        • Figs. DR1-DR7

9    **Description of Mechanical model**

10        The mechanical model is based on quasi-static force equilibrium and mass  
11 balance of a viscoelastic fluid subjected to plane strain deformation and gravity  
12 (Simpson, 2015). The model considers a two-dimensional vertical depth section  
13 (180 km wide x 60 km deep) containing a single inclined planar fault discontinuity  
14 embedded within an elastic material (with a shear modulus of  $30 \times 10^9$  Pa and  
15 Poisson's ratio of 0.25) that is underlain by a high viscosity ( $10^{19}$  Pa s) Maxwell  
16 viscoelastic material (Fig. DR1). The model faults are assumed to be optimally  
17 oriented for frictional sliding. Thus, for a typical background friction coefficient of  
18 0.577, the reverse faults have dips of  $30^\circ$ , whereas the normal faults have dips of  
19  $60^\circ$ . The initial differential stresses in the upper layer are computed assuming that

faults are critically stressed for frictional sliding. The thickness of the faulted upper elastic layer is varied between 5 and 30 km. The lower viscoelastic layer is initially assumed to have zero differential stresses. Models are loaded by imposing constant horizontal velocities (of 50 mm/yr) at the lateral boundaries. The upper boundary is a free surface while all other boundaries are free slip. Solutions to the system of partial differential equations were computed using the continuous Galerkin Finite Element Method using 7-node triangles for velocities and 3 nodes for pressures.

The fault in each model exhibits stick-slip behavior that is governed by rate- and state-friction. Fault friction is calculated from the lab-derived law (Noda et al., 2009)

$$\mu = a \ln \left( \frac{v}{v_o} \right) + \theta \quad (3)$$

where  $v$  is the slip velocity, and  $\theta$  is a state variable that is computed by solving

$$\frac{\partial \theta}{\partial t} = -\frac{v}{D_c} (\mu - \mu_{ss}) \quad (4)$$

with the steady state friction value

$$\mu_{ss} = \mu_o + (a - b) \ln \left( \frac{v}{v_o} \right) \quad (5)$$

Here  $\mu_o$  is a reference friction coefficient for steady sliding at velocity  $v_o$ ,  $a$  and  $b$  are dimensionless parameters characterizing the direct and state evolution effects, respectively, and  $D_c$  is the state evolution distance. In this slip-law formulation I set the shear stress on the fault (computed by solving the quasi-static viscoelastic problem) to the fault strength, modified to account for radiation damping, i.e.,

$$\tau = \mu \tilde{\sigma}_n + \frac{G}{2c_s} v \quad (6)$$

where  $\tau$  and  $\tilde{\sigma}_n$  are the shear and effective normal stresses resolved on the fault,  $G$  is the shear modulus,  $c_s$  is the shear wave speed and  $\mu$  is the variable friction coefficient given by equation (3). This nonlinear equation (i.e., 6) is solved for the sliding velocity that is then imposed on the fault using the split-node technique (Melosh and Raefsky, 1981).

Although most calculations presented are based on a ‘standard’ rate- and state-friction law (i.e., equations 3-5) I also carried out simulations incorporating additional dramatic weakening at seismic slip rates, which has been demonstrated in laboratory friction experiments (e.g., Di Toro et al., 2011; Nielsen et al., 2016). Enhanced weakening was introduced (after Noda et al., 2009) by replacing equation (5) with

$$\mu_{LV} = \mu_o + (a - b) \ln \left( \frac{v}{v_o} \right) \quad (7)$$

53 and

$$54 \quad \mu_{ss} = \begin{cases} \mu_{LV} & \text{if } v \leq v_w \\ \mu_w + (\mu_{LV} - \mu_w)(v_w/v) & \text{if } v > v_w \end{cases} \quad (8)$$

55 Here,  $\mu_{LV}$  is the conventional low velocity steady-state friction coefficient,  $a$  and  $b$   
56 are the standard rate and state parameters, respectively,  $\mu_o$  is the friction  
57 coefficient at the reference sliding velocity  $v_o$ ,  $v_w$  is the sliding velocity at the  
58 onset of enhanced weakening and  $\mu_w$  is the fully weakened friction coefficient  
59 (that may be close to 0.2).

60 Unless stated otherwise, calculations presented here were performed with the  
61 following parameter values:  $\mu_o=0.6$ ,  $v_o = 10^{-6}$  m/s,  $a = 0.015$ ,  $c_s=3$  km/s,  $D_c = 0.07$   
62 m,  $\theta_{\text{initial}} = 0.5$ . The state parameter  $b$  is taken to be 0.02 until 2 km above the base  
63 of the fault when it is assumed to decrease linearly with depth to 0 (Fig. DR1C).  
64 This implies that the lower portion of each fault exhibits velocity strengthening  
65 behavior ( $a-b>0$ ) whereas the upper part is velocity weakening (since  $a-b<0$ ).  
66 These parameter values are similar to those used in other earthquake modeling  
67 studies. A friction coefficient of 0.6 is chosen to be consistent with Byerlee's law  
68 (Byerlee, 1978).

69 In most simulations presented, elastic waves are neglected but inertial effects  
70 are considered via the radiation damping approximation (Rice, 1993), making the

model quasi-dynamic. Additional simulations were performed incorporating full inertia (e.g., see results in Figs. DR2-4). Fluid pressures are not explicitly considered but are incorporated by modifying the initial effective normal stresses. Dynamic effects related coseismic temperature variation are not explicitly treated (e.g., see Noda and Lapusta, 2010) but were investigated indirectly by incorporating enhanced dynamic friction weakening. Off-fault damage is not considered in the simulations, which is considered reasonable since it appears to have a minor influence on earthquake properties such as the total coseismic slip (Thomas et al., 2017).

The model faults exhibit a natural transition from slow slip during the interseismic period to rapid slip during ‘earthquakes’. This threshold-type behavior requires adaptive time stepping. The time step is roughly proportional to  $D_c/v$  (where  $D_c$  is the slip weakening distance and  $v$  is the computed slip velocity), so it varies by approximately 10 orders of magnitude between the interseismic and coseismic periods. Calculations performed with excessively large time steps exhibit oscillatory slip velocities (Fig. DR7A) that disappear when the time step is sufficiently reduced (cf. Figs. DR7B and DR7C).

The calculations also require a highly resolved spatial grid in order to achieve accurate and stable solutions. The element size for resolved solutions is controlled by the parameter grouping  $2GD_c/\pi\tilde{\sigma}_n(b-a)$  (see Rice 1993). Although

this limit implies exceedingly small elements, I follow a common approach (Rice 1993) by assigning artificially large values to  $D_c$  (usually 0.07 m) to relax the element size limit. I also take advantage of an unstructured triangular mesh (Fig. DR1A) that enables relatively small elements (on the order of 100 m long) to be used along the fault whereas the elements elsewhere can be much larger (i.e., by at least one order of magnitude).

### **Description of Monte Carlo model**

The static stress drop of earthquakes in the quasi-dynamic Finite Element models is well described by the empirical relation

$$\Delta\tau = \left(1 - \frac{\mu_d}{\mu_s}\right) \bar{\tau} \quad (9)$$

where  $\Delta\tau$  is the average static stress drop associated with an earthquake,  $\bar{\tau}$  is the average shear stress on the fault,  $\mu_d$  is the kinematic friction coefficient during rupture and  $\mu_s$  is the static friction coefficient typical of the interseismic period (Fig. DR4). The stress drop is linked to the mean coseismic slip via the well known relation from static crack theory (Scholz, 2002):

$$\bar{u} = \frac{\Delta\tau W}{G C} \quad (10)$$

where  $G$  is the shear modulus,  $W$  is the down-dip rupture width and  $C = 4(\lambda + G)/\pi(\lambda + G)$  where  $\lambda$  is the Lamé constant. To evaluate whether one can expect to

observe notable differences in stress drops and slip magnitudes for earthquakes occurring at different depths and in different tectonic stress regimes when the frictional properties also vary, I adopted a Monte Carlo approach , repeatedly solving (9) and (10) for a large number of events (at least 100,000) while randomly varying the tectonic stress regime (i.e., compressive versus extensive), hypocenter depth (which controls the average shear stress), and the static and dynamic friction coefficients within reasonable limits. Faults are assumed to be governed by Andersonian faulting theory. Accordingly, the average vertical stress on the fault is taken as the lithostatic stress at the rupture mid-depth  $H$  (i.e.,  $\rho g H$ ), while the horizontal stress is that required to initiate frictional sliding, i.e.,  $\bar{\tau} = \mu_s \tilde{\sigma}_n$  where  $\tilde{\sigma}_n$  is the effective normal stress:

$$\tilde{\sigma}_n = \frac{(\sigma_1 + \sigma_3)}{2} - p_f + \frac{(\sigma_1 - \sigma_3)}{2} \cos 2\vartheta$$

and  $\bar{\tau}$  is the average shear stress on the fault:

$$\bar{\tau} = \frac{(\sigma_1 - \sigma_3)}{2} \sin 2\vartheta$$

Here  $\sigma_1, \sigma_3, p_f$  and are the maximum and minimum principal stresses and fluid pressure at  $H$ ,  $\mu_s$  is the static friction coefficient and  $\tan \vartheta = \mp 1/\mu_s$ . For reverse faulting, the vertical and horizontal stresses are assumed to be the minimum and maximum principal stresses, respectively, whereas the converse is true for normal faulting.

Parameters values used for the calculations were chosen to be physically realistic but were fine-tuned by fitting the computed stress drop distribution to natural stress drop data from Allmann and Schearer (2009). Parameters maintained constant were the rock density ( $\rho = 2800 \text{ kg m}^{-3}$ ), fluid density ( $\rho_f = 1000 \text{ kg m}^{-3}$ ) and shear modulus ( $G = 30 \text{ GPa}$ ). The rupture mid-depth ( $H$ ) was chosen from a normal distribution with a mean of 15 km and a standard deviation of 5 km. The static friction coefficient  $\mu_s$  was chosen from a normal distribution with a mean of 0.7 and a standard deviation of 0.1. Faults were randomly chosen to be either reverse or normal from a uniform distribution. Good fits with data were obtained, which suggests that the parameters are reasonable, though equally good fits can be obtained with other parameter combinations.

I considered two different end-member fault stress scenarios. In the first (Fig. 3A of main text), fluid pressures were assumed to be hydrostatic, implying that faults operate at relatively high shear stresses. In the second case (Fig. 3B), I assumed that the minimum effective principal stress cannot exceed a constant value  $\tilde{\sigma}_c$ . The values for  $\tilde{\sigma}_c$  were chosen from a Weibull distribution, with scale and shape parameters of 20 MPa and 1.7 MPa, respectively. This implies large fluid overpressures at depth, which leads to low and constant shear stresses below an upper ‘normally’ pressured regime (Fig. DR7). For both scenarios presented in Figure 3 (main text), the friction drop  $\Delta\mu (= \mu_s - \mu_d)$  was chosen from a log-



148 normal distribution with means of 0.015 (case 1) and 0.014 (case 2) and standard  
149 deviations of 0.0144 (case 1) and 0.012 (case 2).

150

151 **Table DR1:** Rupture properties of large crustal earthquakes ( $M_w$ =moment magnitude,  $L$  =  
 152 rupture length,  $W$  = down-dip rupture width,  $D$  = mean coseismic slip amplitude). Only  
 153 earthquakes with  $W \leq 40$  km are studied. Except for the last three entries, the data are from the  
 154 finite-source rupture model database (SRCMOD; Mai, 2016). The last three earthquake entries  
 155 are from the following references: Borah Peak (Stein and Barrientos, 1985), Kozani Grevena  
 156 (Clark et al., 1997), Yutian County (Furuya and Yasuda, 2011). The data are plotted in Fig. 4  
 157 (main text).

| Location                   | Date      | Depth<br>(km) | $M_w$ | Rake<br>(°) | L (km) | W(km) | D (m)  |
|----------------------------|-----------|---------------|-------|-------------|--------|-------|--------|
| Brawley Swarm              | 26-Aug-12 | 6.4           | 5.45  | 0           | 12.75  | 10.5  | 0.0782 |
| Sumatra                    | 10-Jan-12 | 18.37         | 7.2   | 173.39      | 90     | 21    | 1.2888 |
| Darfield, South Island, NZ | 03-Sep-10 | 10.84         | 7.02  | 153.63      | 80     | 26    | 0.6029 |
| El Mayor-Cucapah, Mexico   | 04-Apr-10 | 10            | 7.35  | -174        | 120    | 16    | 1.8905 |
| Haiti                      | 12-Jan-10 | 12.93         | 7.1   | 31.59       | 50     | 24    | 1.3988 |
| Gulf of California         | 03-Aug-09 | 9.16          | 6.9   | 171.72      | 108    | 20.8  | 0.311  |
| L Aquila, Italy            | 06-Apr-09 | 8.64          | 6.3   | -99         | 30     | 24    | 0.1767 |
| Zhongba, Tibet             | 25-Aug-08 | 7.63          | 6.7   | 306         | 31     | 30.49 | 0.2383 |
| Honshu, Japan              | 13-Jun-08 | 9.49          | 6.8   | 102.68      | 42     | 22    | 0.8423 |
| Iwate - Miyagi Nairiku     | 13-Jun-08 | 6.5           | 7     | 99          | 42.66  | 17.38 | 1.8231 |

|                            |             |       |      |        |       |       |        |
|----------------------------|-------------|-------|------|--------|-------|-------|--------|
| Yutian, Tibet              | 20-Mar-08   | 4.1   | 7.1  | 282.33 | 53.5  | 21.99 | 1.503  |
| Gerze, Tibet               | 16-Jan-08   | 4     | 5.9  | 273    | 15    | 10.02 | 0.1999 |
| Gerze, Tibet               | 09-Jan-08   | 7.5   | 6.4  | 293    | 20    | 19.58 | 0.3729 |
| Niigata-ken Chuetsu-Oki    | 17-Aug-07   | 8.9   | 6.6  | 99     | 36.75 | 29.75 | 0.2882 |
| Noto Hanto, Japan          | 25-Mar-07   | 9.62  | 6.73 | 138.9  | 30    | 16    | 1.0864 |
| Kuril Islands              | 13-Jan-07   | 10    | 8.1  | -97.96 | 224   | 40    | 3.5631 |
| Northern California        | 15-Jun-05   | 9     | 7.2  | 362.3  | 102   | 35    | 0.6718 |
| Zhongba, Tibet             | 07-Apr-05   | 5.98  | 6.2  | 292    | 28    | 18.67 | 0.1868 |
| Fukuoka (Japan)            | 20-Mar-05   | 14    | 6.6  | -14    | 26    | 18    | 0.6797 |
| Niigata-Ken Chuetsu, Japan | 23-Oct-04   | 10.6  | 6.62 | 91.3   | 28    | 18    | 0.6663 |
| Zhongba, Tibet             | 11-Jul-04   | 10    | 6.2  | 282    | 20    | 26.11 | 0.1357 |
| Miyagi-hokubu (Japan)      | 25-Jul-03   | 6.5   | 6.08 | 180    | 12    | 9.6   | 0.4736 |
| Carlsberg Ridge            | 15-Jul-03   | 11.33 | 7.6  | 166.96 | 320   | 36    | 0.5498 |
| Boumerdes (Algeria)        | 21-May-2003 | 16    | 7.25 | 90     | 64    | 32    | 1.2428 |
| Denali (Alaska)            | 03-Nov-02   | 7.5   | 7.91 | 228.55 | 346   | 30    | 2.1475 |
| Geiyo (Japan)              | 24-Mar-01   | 46.46 | 6.79 | 109    | 30    | 21    | 0.8313 |
| Bhuj (India)               | 26-Jan-01   | 18    | 7.66 | 81     | 75    | 35    | 3.1538 |
| Tottori (Japan)            | 06-Oct-00   | 14.5  | 6.73 | 180    | 32    | 20    | 0.6157 |
| Kleifarvatn (Iceland)      | 17-Jun-00   | 4     | 5.87 | 188.04 | 10    | 8     | 0.2811 |

|                                 |           |      |      |        |       |       |        |
|---------------------------------|-----------|------|------|--------|-------|-------|--------|
| Duzce (Turkey)                  | 12-Nov-99 | 18   | 7.18 | 182    | 60    | 30    | 1.1204 |
| Hector Mine (Calif.)            | 16-Oct-99 | 7.5  | 7.14 | 175    | 54    | 18    | 1.8145 |
| Izmit (Turkey)                  | 17-Aug-99 | 16   | 7.4  | 180    | 93.6  | 21.6  | 2.2454 |
| Hida Swarm EV16 (Japan)         | 18-Sep-98 | 1.85 | 4.41 | 181    | 3     | 3.48  | 0.0134 |
| Iwate (Japan)                   | 03-Sep-98 | 3    | 6.3  | 131    | 10    | 10    | 0.3948 |
| Pumqu-Xainza, Tibet             | 25-Aug-98 | 8.25 | 6.16 | 300.66 | 38    | 23    | 0.0679 |
| Antarctica Strike-Slip Segment  | 25-Mar-98 | 12   | 7.98 | 1      | 305   | 35    | 2.9824 |
| Colfiorito Sequence # 3 (Italy) | 14-Oct-97 | 5.58 | 5.86 | 270    | 9     | 6     | 0.4512 |
| Colfiorito Sequence # 1 (Italy) | 26-Sep-97 | 4.04 | 5.72 | 270    | 7.5   | 7.5   | 0.2744 |
| Colfiorito Sequence # 2 (Italy) | 26-Sep-97 | 5.1  | 5.97 | 270    | 12.5  | 7.5   | 0.396  |
| Yamaguchi (Japan)               | 25-Jun-97 | 8.2  | 5.82 | 180    | 16    | 14    | 0.0812 |
| Kagoshimaen-hoku-seibu (Japan)  | 26-Mar-97 | 7.6  | 6.1  | 0      | 15    | 10    | 0.3391 |
| Hyuga-nada2 (Japan)             | 02-Dec-96 | 20.4 | 6.68 | 80     | 29.2  | 29.2  | 0.4218 |
| Hyuga-nada1 (Japan)             | 19-Oct-96 | 11.6 | 6.81 | 80     | 32.12 | 32.12 | 0.5415 |
| Pumqu-Xainza, Tibet             | 03-Jul-96 | 8.25 | 6.08 | 301.42 | 25    | 18    | 0.1022 |
| Kobe (Japan)                    | 17-Jan-95 | 14.3 | 6.9  | 180    | 60    | 20    | 0.6532 |
| Northridge (Calif.)             | 17-Jan-94 | 17.5 | 6.66 | 105    | 23    | 27    | 0.5213 |
| Pumqu-Xainza, Tibet             | 20-Mar-93 | 8.25 | 6.29 | 294.33 | 30    | 22    | 0.1393 |
| Landers (Calif.)                | 28-Jun-92 | 7    | 7.2  | 180    | 77    | 15    | 1.8878 |

|                             |           |       |      |     |    |       |        |
|-----------------------------|-----------|-------|------|-----|----|-------|--------|
| Joshua Tree (Calif.)        | 23-Apr-92 | 12.5  | 6.15 | 0   | 22 | 20    | 0.1245 |
| Ungava (Canada)             | 25-Dec-89 | 2.5   | 6.02 | 90  | 13 | 6     | 0.4636 |
| Loma Prieta (Calif.)        | 18-Oct-89 | 17.6  | 6.98 | 145 | 40 | 14    | 1.8038 |
| Superstition Hills (Calif.) | 24-Nov-87 | 10    | 6.51 | 180 | 20 | 11.5  | 0.8291 |
| Elmore Ranch (Calif.)       | 24-Nov-87 | 10    | 6.52 | 0   | 25 | 10    | 0.8976 |
| Whittier Narrows (Calif.)   | 01-Oct-87 | 14.6  | 5.89 | 90  | 10 | 10    | 0.2625 |
| Nahanni2 (Canada)           | 23-Dec-85 | 8     | 6.66 | 90  | 48 | 21.24 | 0.4844 |
| Nahanni1 (Canada)           | 05-Oct-85 | 8     | 6.66 | 90  | 40 | 17.4  | 0.5359 |
| Nagano-ken seibu (Japan)    | 14-Sep-84 | 3     | 6.29 | 0   | 12 | 9     | 1.0083 |
| Morgan Hill (Calif.)        | 24-Apr-84 | 8.5   | 6.28 | 180 | 30 | 10    | 0.2644 |
| Borah Peak (Idaho)          | 28-Oct-83 | 16    | 6.82 | 280 | 52 | 26.64 | 0.357  |
| Izu-hanto-toho-oki (Japan)  | 29-Jun-80 | 8     | 6.61 | 0   | 20 | 12    | 1.06   |
| Imperial Valley (Calif.)    | 15-Oct-79 | 8     | 6.35 | 180 | 42 | 10    | 0.4118 |
| Coyote Lake (Calif.)        | 06-Aug-79 | 8     | 5.92 | 176 | 10 | 10    | 0.2608 |
| Izu-hanto-oki (Japan)       | 09-May-74 | 8     | 6.56 | 180 | 25 | 9     | 1.06   |
| San Fernando (Calif.)       | 09-Feb-71 | 13    | 6.82 | 83  | 18 | 20    | 1.6006 |
| Gifu-ken-chubu (Japan)      | 09-Sep-69 | 2     | 6.43 | 180 | 20 | 11.2  | 0.68   |
| Kitamino (Japan)            | 19-Aug-61 | 10    | 6.47 | 90  | 16 | 12    | 0.9083 |
| Fukui (Japan)               | 28-Jun-48 | 10.14 | 6.65 | 351 | 60 | 18    | 0.3    |

|                         |           |        |     |     |    |     |
|-------------------------|-----------|--------|-----|-----|----|-----|
| Borah Peak              | 28-Oct-83 | 16     | 6.9 | -90 | 18 | 2   |
| KozaniGrevena           | 13-May-95 | ca. 15 | 6.5 | -90 | 20 | 0.3 |
| Yutian County, Xinjiang | 20-Mar-08 | ca. 15 | 7.1 | -90 | 24 | 1   |

158

159

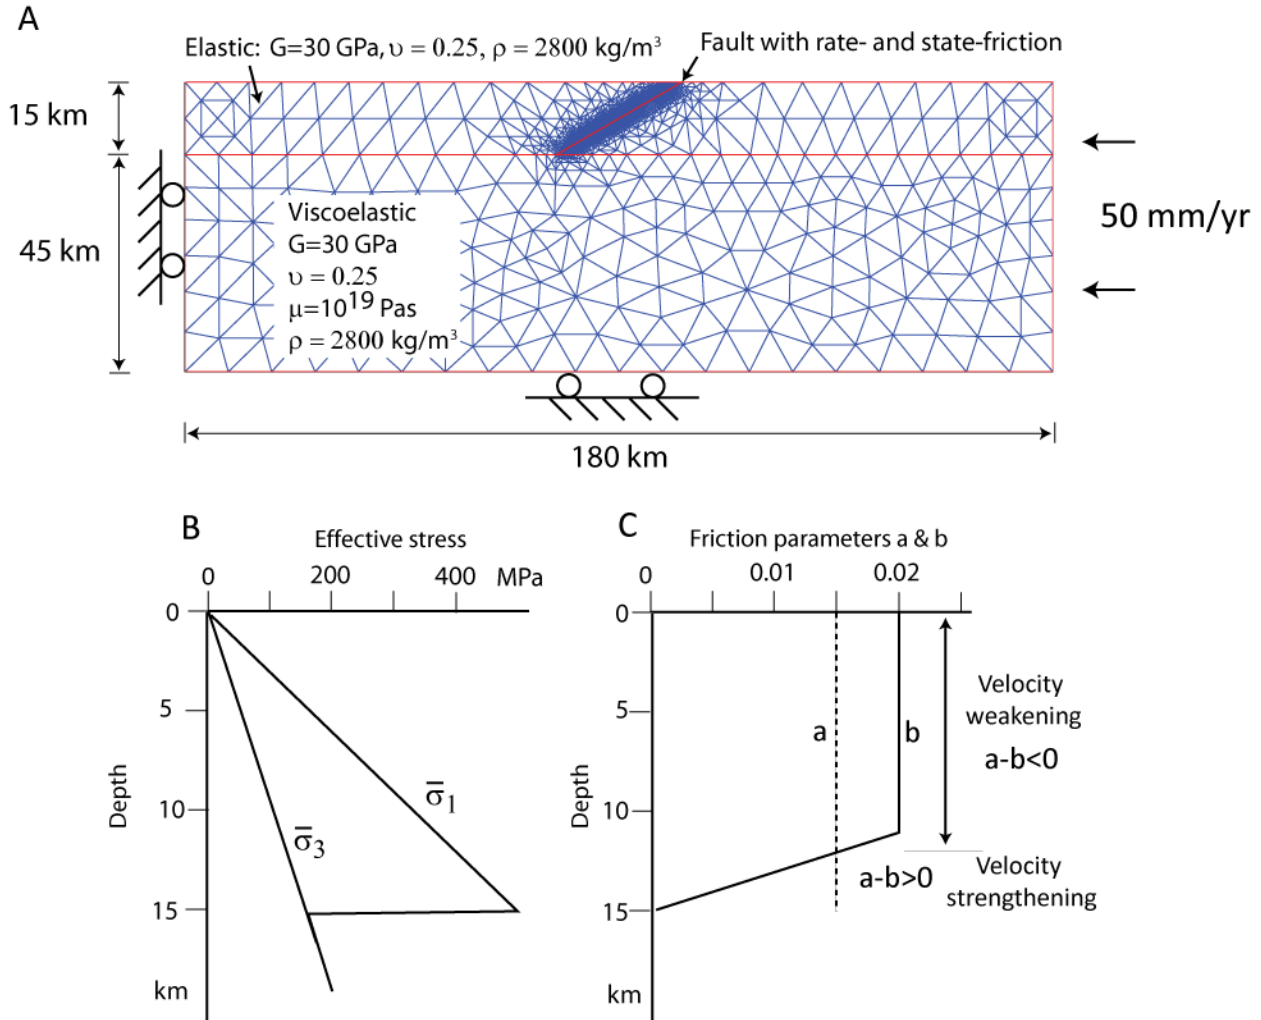

161

**Figure DR1 A-C:** Typical mode setup for earthquake simulation on a reverse fault. A: Planar reverse fault embedded in an elastic layer that overlies a viscoelastic layer, subjected to remote loading and gravity. Triangles are finite elements on which the solution is computed. B: Initial effective stress state versus depth in the upper part of the model. C: Variation of the rate- and state-friction parameters  $a$  and  $b$  on the fault.

167

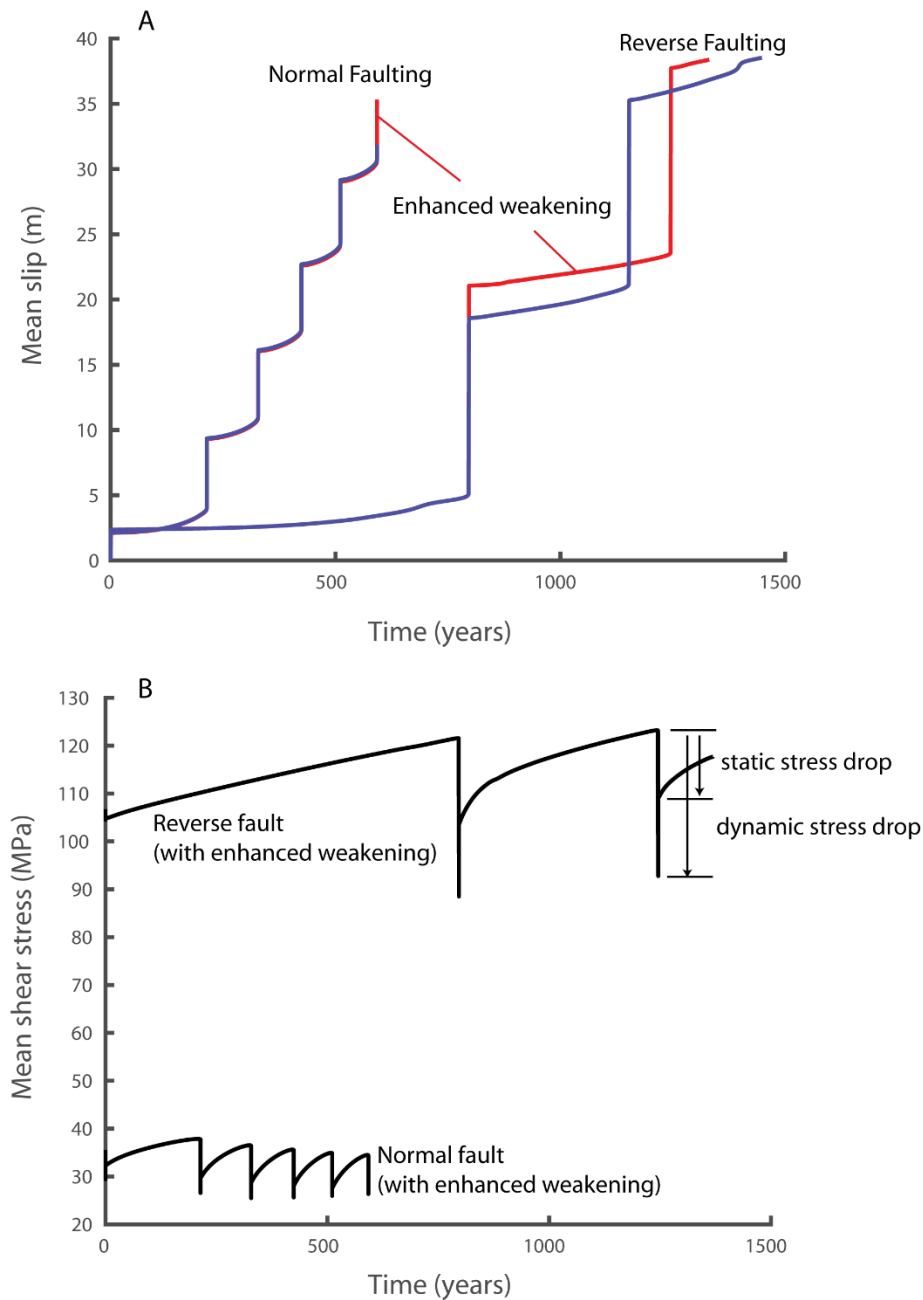

**Figure DR2 A-B:** Mean slip versus time (A) and mean shear stress versus time (B) on reverse and normal faults in numerical experiments incorporating full inertia, with and without enhanced dynamic weakening ( $\mu_w = 0.2$ ,  $v_w = 0.1$  m/s, see equation 8 above). The average slip rate on the normal fault is greater than on the reverse fault because the former has a larger dip.



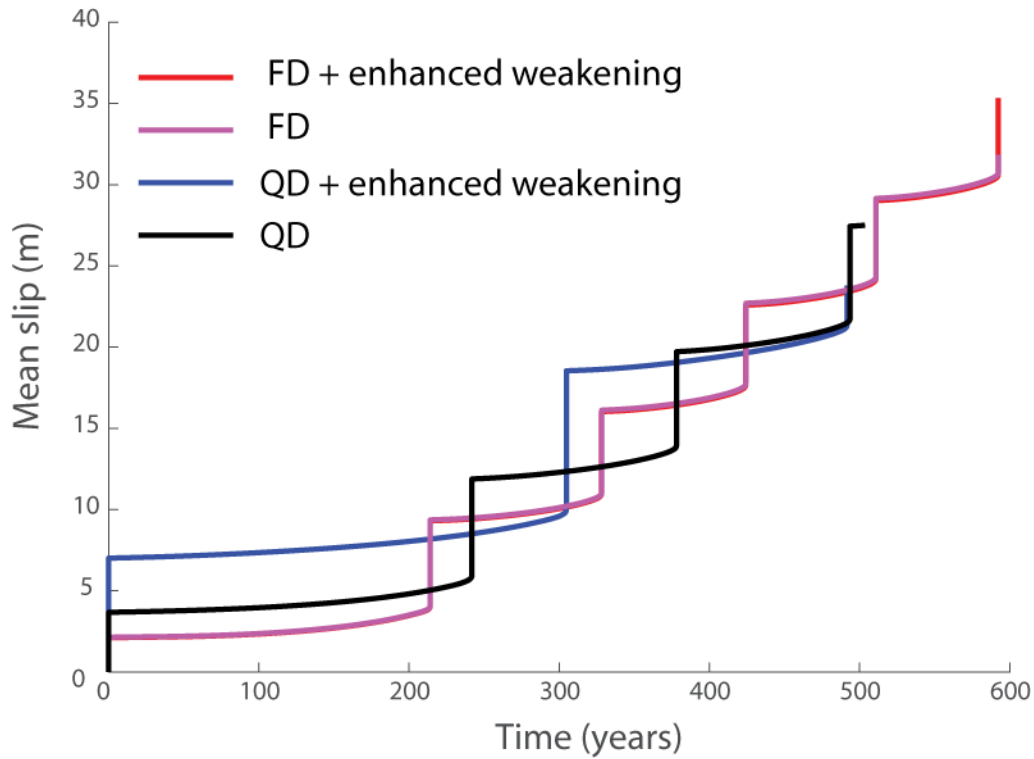

**Figure DR3:** Computed mean slip versus time on a normal fault with and without enhanced dynamic weakening and full inertia (FD = fully dynamic, QD = quasi-dynamic). Simulations with enhanced weakening were calculated with  $\mu_w = 0.2$ ,  $v_w = 0.1$  m/s (see equation 8 above). Otherwise, classic rate-and state-dependent friction was assumed, using the parameters listed above.

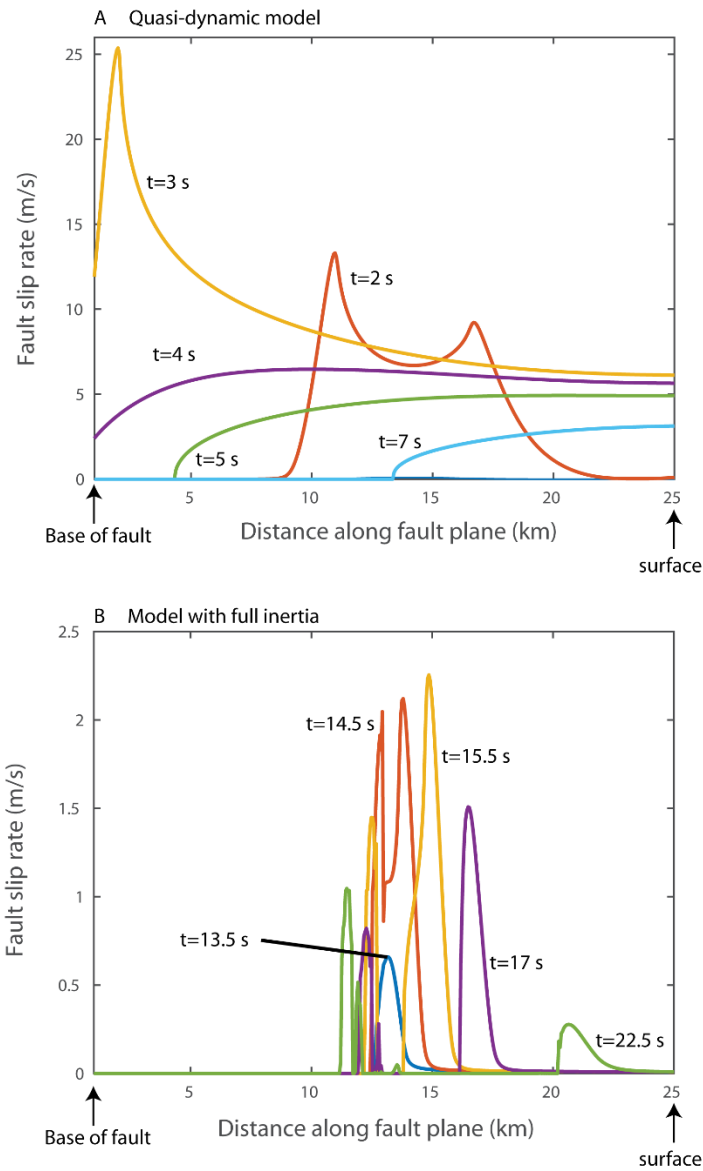

**Figure DR4 A-B:** Comparison of the slip rate versus distance along the fault for simulations using the quasi-dynamic approximation (A) and full inertia (B). In both cases, the ruptures are on reverse faults with identical material properties. The rupture in the quasi-dynamic simulation propagates as a crack, while that in the simulation with full inertia propagates as a slip pulse. Even so, the simulations exhibiting pulse-like behavior still show larger slips on reverse faults than normal faults, when ambient stress levels are high (see Fig DR2).

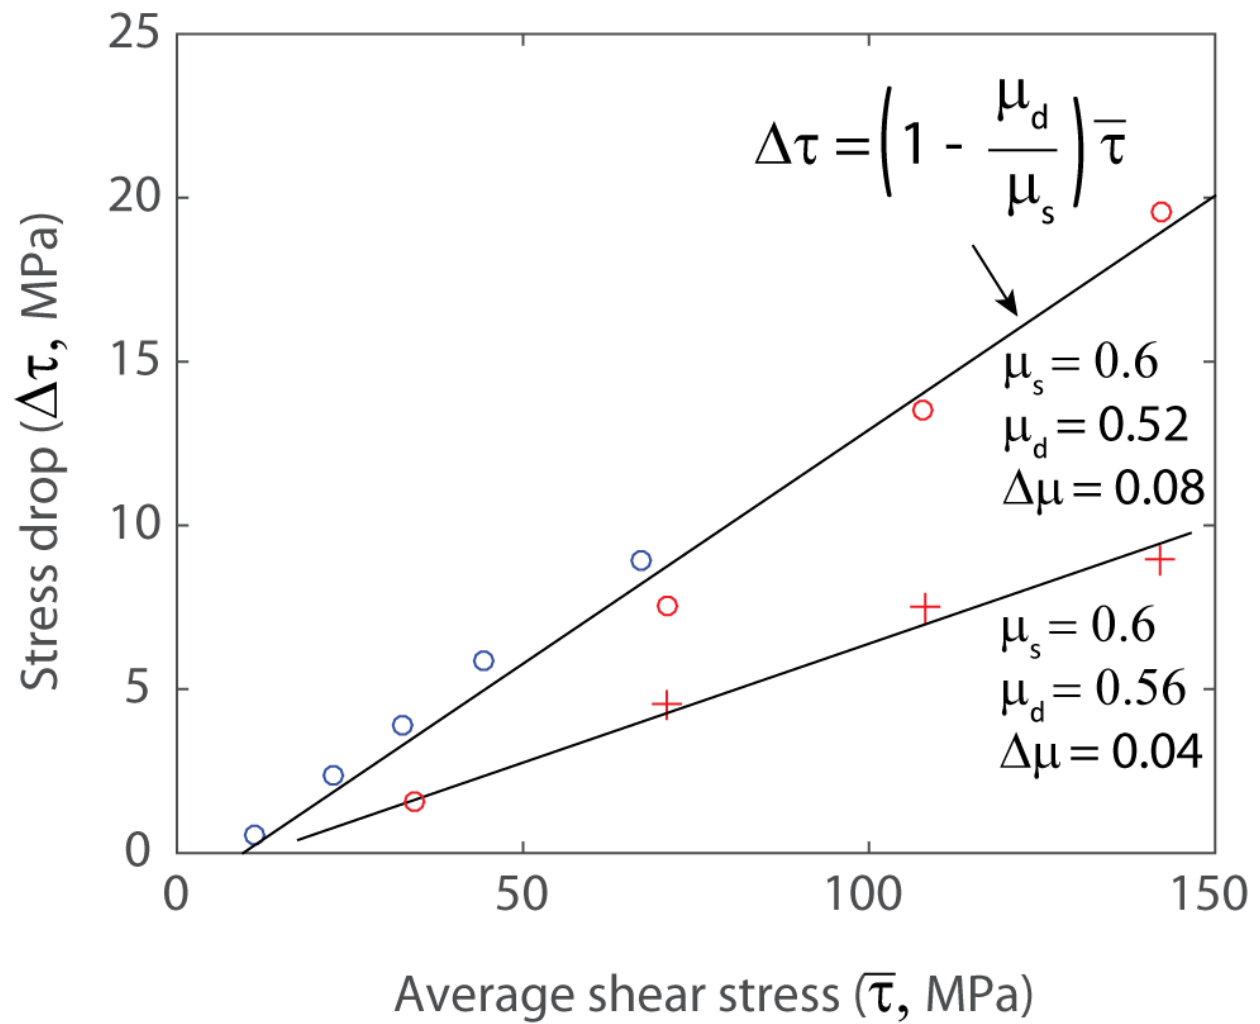

191 **Figure DR5:** Scaling between static stress drop versus average shear stress. Symbols show  
 192 results of the finite element quasi-dynamic simulations while the solid lines show stress drop  
 193 predictions based on equation (9).

195

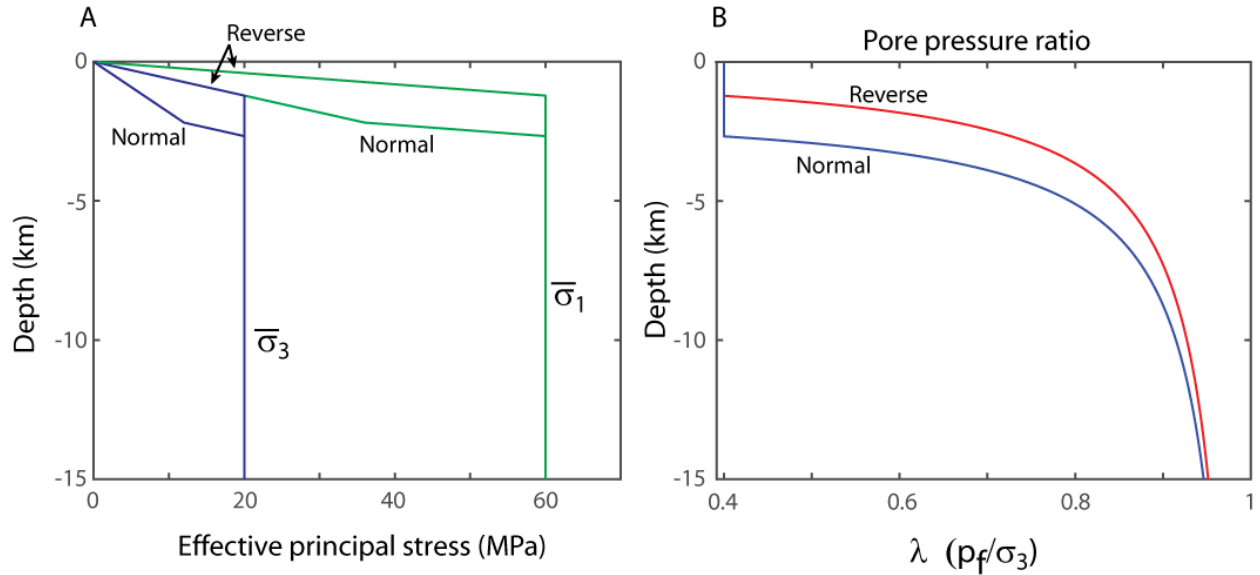

196

197 **Figure DR6 A-B:** Illustration of initial effective principal stress state in models considering fluid  
 198 overpressures. The upper part of the crust is assumed to have hydrostatic fluid pressures whereas  
 199 the underlying rocks have overpressures governed by the condition  $\tilde{\sigma}_3 = \tilde{\sigma}_c$  where  $\tilde{\sigma}_c$  is a  
 200 constant (in this case 20 MPa). Stresses are defined by Andersonian faulting theory with a  
 201 friction coefficient of 0.6 and a rock density of 2800 kg/m<sup>3</sup>. A: Variation of the effective  
 202 principal stresses with depth for reverse and normal faulting stress regimes. B: Variation in the  
 203 pore pressure ratio (defined here as the ratio between the fluid pressure and the total minimum  
 204 principal stress) with depth for reverse and normal fault regimes.

205

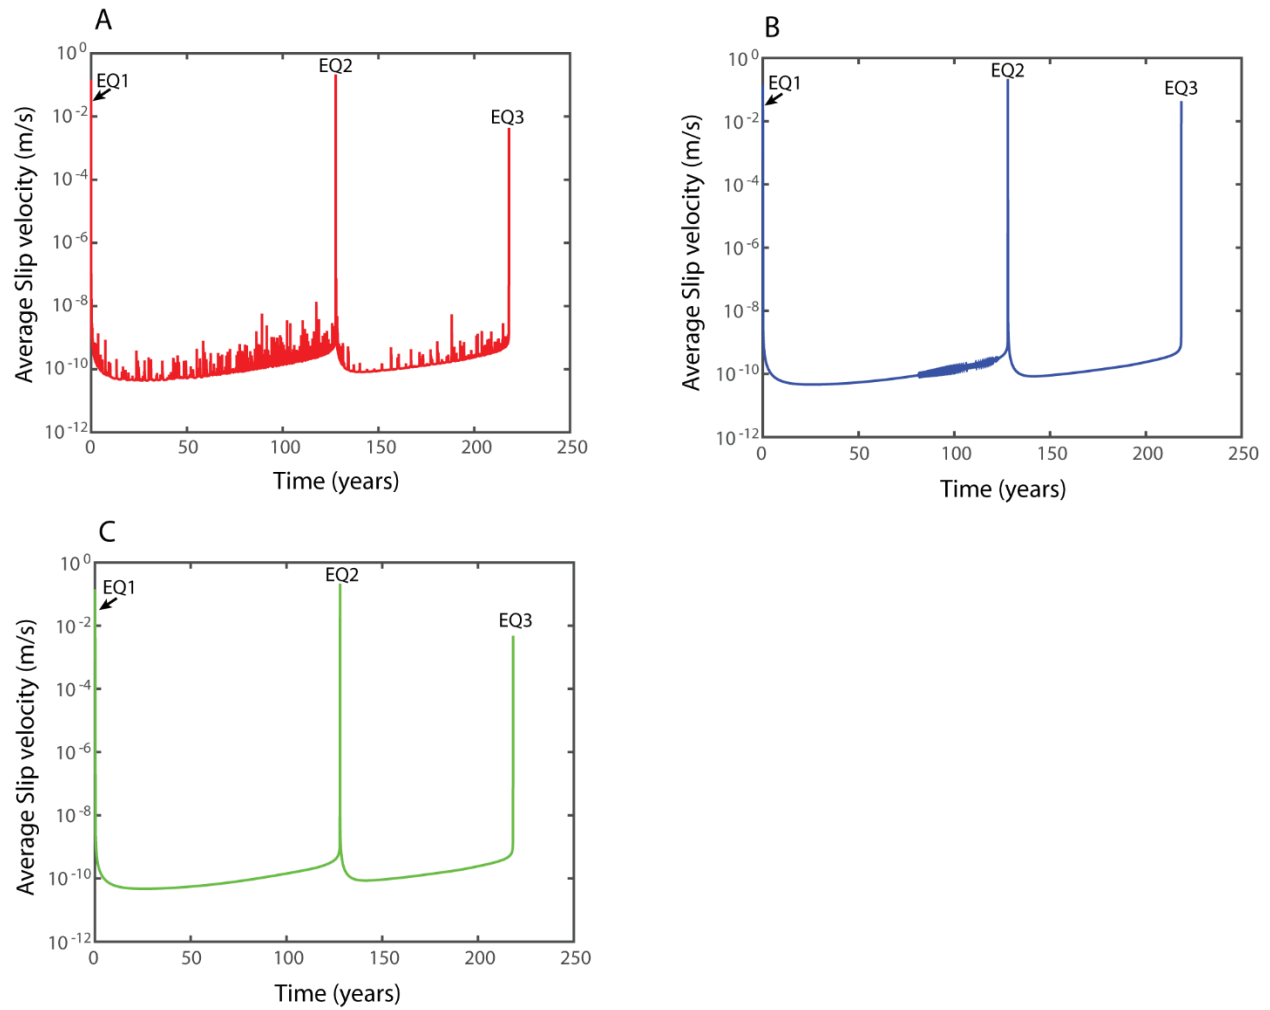

**Figure DR7 A-C:** Illustration of time scale resolution in quasi-dynamic numerical experiments. Plots show the mean slip velocity on the fault versus time for quasi-dynamic simulations performed with different temporal resolutions. The excessively large time step in (A) leads to numerical oscillations. Reducing the time step by a factor of two reduces the oscillations (B), which disappear entirely when the time step is decreased another two times (C).

## References

- Allmann, B.P. and Shearer, P.M., 2009, Global variations of stress drop for moderate to large earthquakes: *Journal of Geophysical Research*, v. 114, doi:10.1029/2008jb005821.
- Byerlee, J.D. Friction of rocks, *Pure and Applied Geophysics*, v. 116, 615-626.
- Clarke, P. J., Paradissis, D., Briole, P., England, P.C., Parsons, B.E., Billiris, H., Veis, G., Ruegg, J.-C., 1997, Geodetic investigation of the 13 May 1995 Kozani-Grevena (Greece) Earthquake: *Geophysical Research Letters*, v. 24, p. 707-710, doi:10.1029/97GL00430.
- Di Toro, G., Han R., Hirose, T., De Paola, N., Nielsen, S., Mizoguchi, K., Ferri, F., Cocco, M., Shimamoto, T., 2011, Fault lubrication during earthquakes: *Nature*, v. 471, p. 494-498, doi:10.1038/nature09838.
- Furuya, M. and Yasuda, T., 2011, The 2008 Yutian normal faulting earthquake (Mw 7.1), NW Tibet: Non-planar fault modeling and implications for the Karakax Fault: *Tectonophysics*, v. 511, p. 125-133, doi:10.1016/j.tecto.2011.09.003.
- Mai, M., 2016, Finite-Source Rupture Model Database, <<http://equake-rc.info/SRCMOD/>>.
- Melosh, H.,J. and Raefsky, A, 1981, A simple and efficient method for introducing faults into finite element computations: *Bulletin of the Seismological Society of America*, v. 71, p. 1391-1400.
- Nielsen, S., Spagnuolo, E., Smith, S.A.F., Violay, M., Di Toro, G., and A. Bistacchi, 2016, Scaling in natural and laboratory earthquakes: *Geophysical Research Letters*, v. 43, 1504-1510, doi: 10.1002/2015GL067490.
- Noda, H., Dunham, E.M. and Rice, J.R., 2009, Earthquake ruptures with thermal weakening and the operation: *Journal of Geophysical Research*, v. 114, B07302, doi:10.1029/2008JB006143.

- Noda, H., and Lapusta, N., 2010, Three-dimensional earthquake sequence simulations with evolving temperature and pore pressure due to shear heating: effect of heterogeneous hydraulic diffusivity: *Journal of Geophysical Research*, v. 115, doi:10.1029/2010JB007780.
- Rice, J. R., 1993, Spatio-temporal complexity of slip on a fault: *Journal of Geophysical Research*, v. 98, p. 9885–9907, doi:10.1029/93JB00191.
- Scholz, C.H., 2002, *The mechanics of earthquakes and faulting*. Cambridge University Press, Cambridge, 471 p.
- Simpson, G.D. H., 2015, Accumulation of permanent deformation during earthquake cycles on reverse faults: *Journal of Geophysical Research*, v. 120, p. 1958-1974, doi:10.1002/2014JB011442.
- Stein, R.S. and Barrientos, S.E., 1985, Planar High-Angle faulting in the Basin and Range: Geodetic analysis of the 1983 Borah peak, Idaho, Earthquake: *Journal of Geophysical Research*, v. 90, p. 11355-11366.
- Thomas, M.Y., Bhat, H.S. and Klinger, Y, 2017, Effect of brittle off-fault damage on earthquake rupture dynamics. In: *Fault zone dynamic processes: evolution of fault zone dynamic processes: Evolution of fault properties during seismic rupture*. Edited by Thomas, M., Mitchell, T and Bhat H. *Geophysical Monograph*, 227, p. 255-280.

256

257
